# Supplementary material for: Redox properties and catalytic activity of surface-bound human sulfite oxidase studied by a combined surface enhanced resonance Raman spectroscopic and electrochemical approach
Source: Royal Society of Chemistry journal article supplement (doi:10.1039/b927226g), 2010-01-01
Supplement: b927226g.pdf [file b927226g.pdf]

## SUPPLEMENTARY INFORMATION

### Redox properties and catalytic activity of surface-bound human sulfite oxidase studied by a combined surface enhanced resonance Raman spectroscopic and electrochemical approach.

Murat Sezer<sup>a</sup>, Roberto Spricogo<sup>b</sup>, Tillmann Utesch<sup>a</sup>, Diego Millo<sup>a</sup>, Silke Leimkuehler<sup>b</sup>, Maria A. Mroginski<sup>a</sup>, Ulla Wollenberger<sup>b</sup>, Peter Hildebrandt<sup>a</sup>, and Inez M. Weidinger<sup>\*a</sup>

<sup>a</sup> Technische Universität Berlin, Institut für Chemie, Sekr. PC 14, Straße des 17. Juni 135, D-10623 Berlin, Germany.

<sup>b</sup> Institut für Biochemie und Biologie, Universität Potsdam, Karl-Liebknecht Straße 24-25, H. 25, Golm, D-14476, Germany.

E-mail: i.weidinger@mailbox.tu-berlin.de

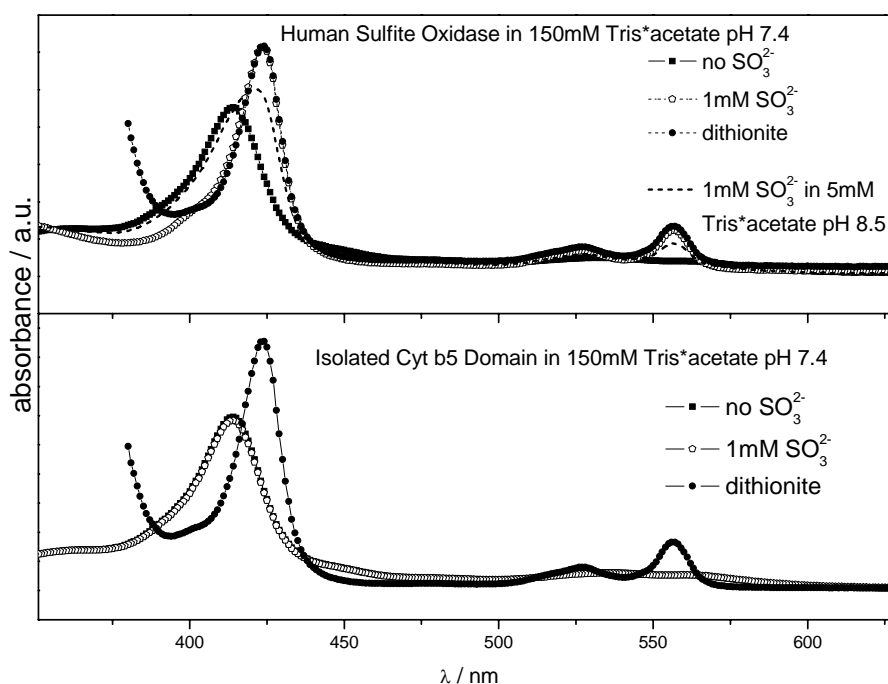

Figure S1: UV-Vis Absorption spectra of Human Sulfite Oxidase (up) and isolated cytochrome b5 domain in the absence and presence of sulfite.

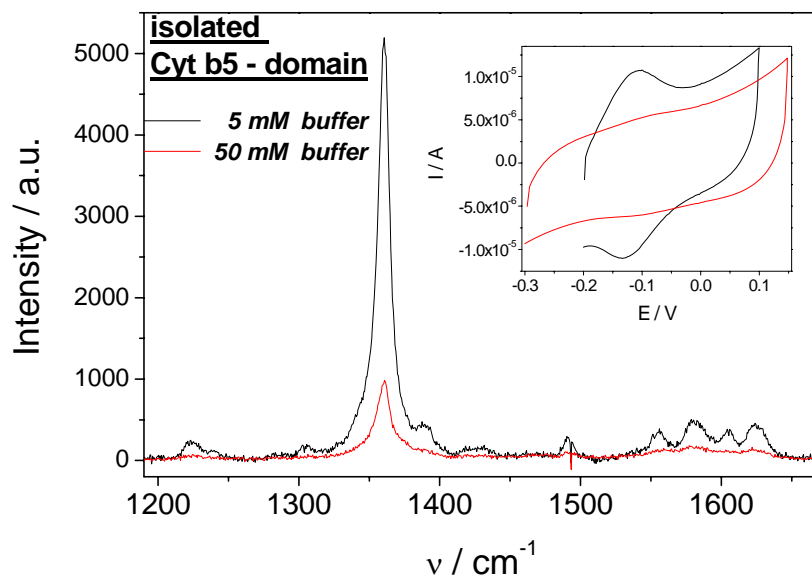

Figure S2: Desorption of the isolated Cyt b5 domain in 50 mM Tris-acetate buffer at pH 7.4 indicated by an irreversible decrease of the SERR- and CV-signal (inset).

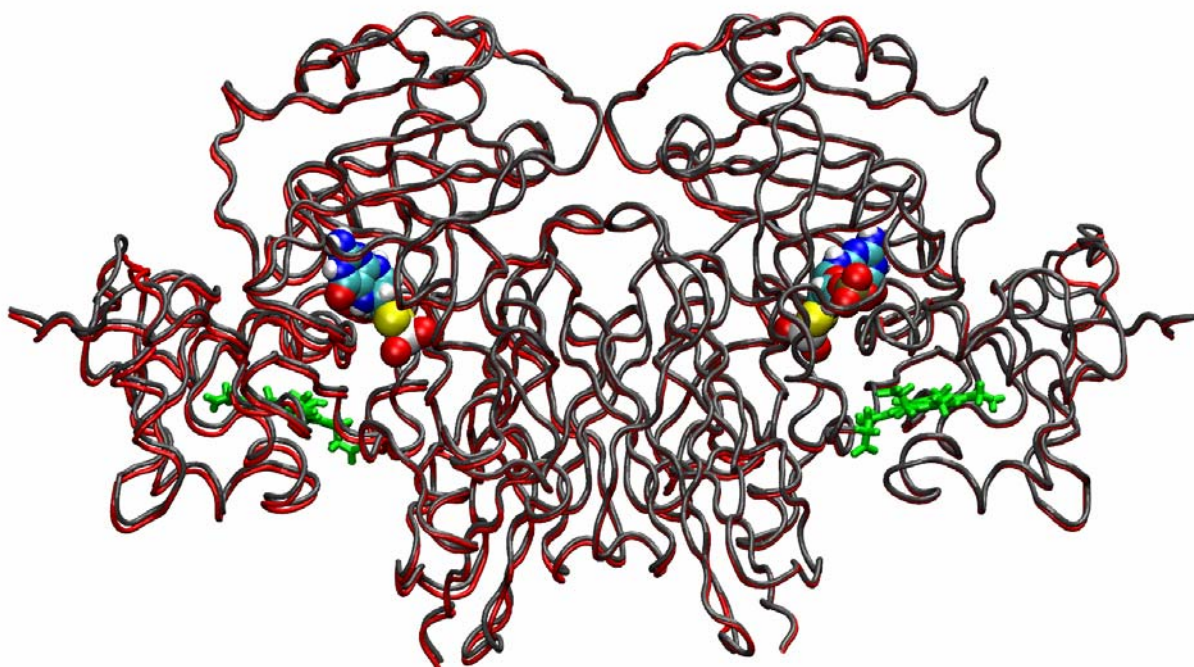

Figure S3: Superposition of crystal structure of chicken liver SO and homology model of hSO.

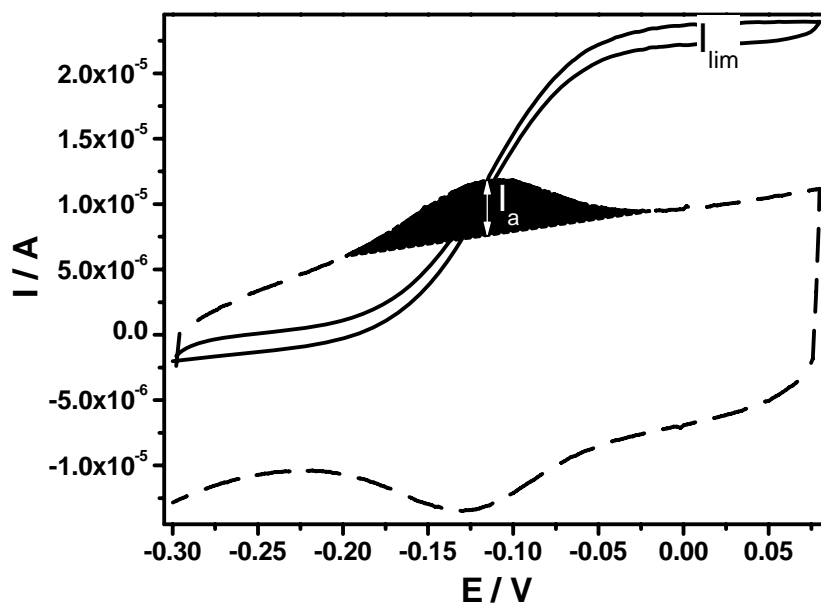

Figure S4: CV of hSO immobilized on an Ag electrode with 1:3 (M/M) C8(NH<sub>2</sub>)/C6(OH) – SAM in 750 mM Tris-acetate at pH 7.4. Dashed line, non-turnover signal at a scan rate of 100 mV/s; solid line, in the presence of 200 μM substrate at a scan rate of 2 mV/s.

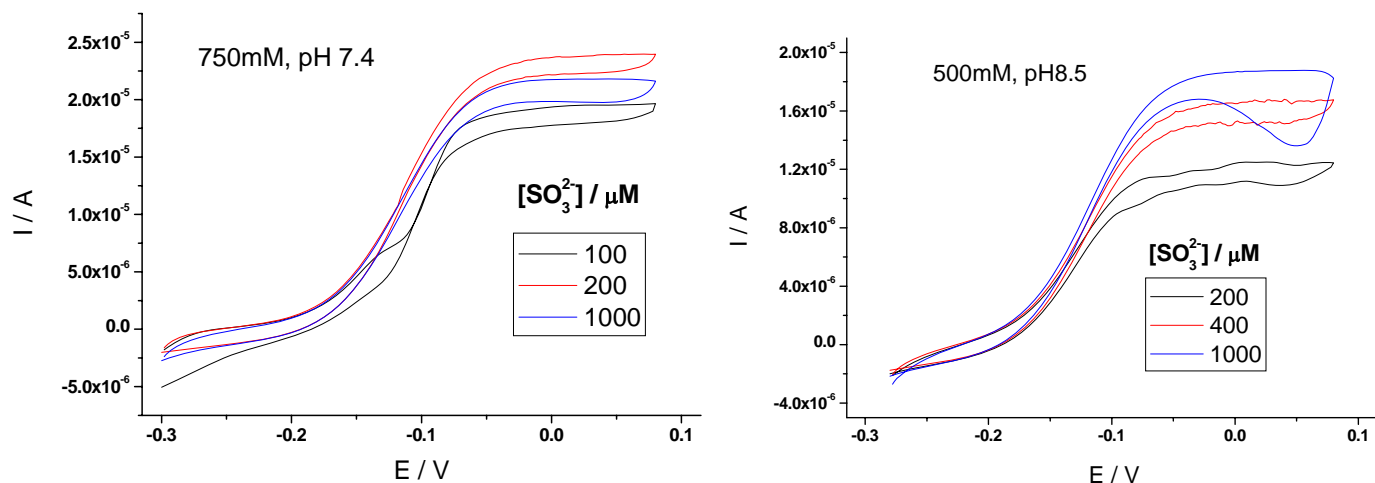

Figure S5: Cyclic voltammograms of human Sulfite Oxidase immobilized on 1:3 C8(NH<sub>2</sub>) / C6(OH) – SAM, rotation of the electrode at 480 rpm and different buffer conditions and substrate concentrations, respectively.
